# Supplementary material
Source: ML conference proceedings conference paper supplement (https://openaccess.thecvf.com/content/CVPR2022/html/Pu_Alignment-Uniformity_Aware_Representation_CVPR_2022_paper.html)
Supplement: Supplementary file 1 [file Pu_Alignment-Uniformity_Aware_Representation_CVPR_2022_supplemental.pdf]

# Supplementary Material for *Alignment-Uniformity aware Representation Learning for Zero-shot Video Classification*

Shi Pu<sup>1\*</sup> Kaili Zhao<sup>2\*</sup> Mao Zheng<sup>1</sup>

<sup>1</sup>Tencent AI Platform Department      <sup>2</sup>Beijing University of Posts and Telecom.  
{shipu, moonzheng}@tencent.com      kailizhao@bupt.edu.cn

## Abstract

*This material includes full derivations that cannot be fitted to the main paper due to the limited space. In specific, we first clarify the formulation of  $\mathcal{L}^{self}$  in the main paper, and then derive the upper bounds of  $\mathcal{L}^{self}$  and  $\mathcal{L}^{sup}$ , at last, illustrate how the visual centers  $w_{y_k}$  approach visual features  $v_{y_k}$ .*

## 1. The formulation of $\mathcal{L}^{self}$ in the main paper

Reviewing the literature in self-supervised learning, we observe that most works [2, 5, 7] formulate the original self-supervised contrastive loss as follows:

$$\mathcal{L}_{ori} = -\log\left[\frac{\exp[\lambda\text{sim}(f_i, f_j)]}{\sum_{k=1}^{2N} \mathbb{1}_{k \neq i} \exp[\lambda\text{sim}(f_i, f_k)]}\right]. \quad (\text{a})$$

Given  $N$  and the augmented samples (*i.e.*, overall  $2N$  samples), there are 1 positive pair in the numerator, the other 1 positive and  $2(N - 1)$  negatives in the denominator. Even there is one positive pair included in the denominator of  $\mathcal{L}_{ori}$ , the methods [3, 11] consider that only the  $2(N - 1)$  negatives contribute to the uniformity property, and propose that the positive pair in the numerator relates with the alignment property. Thus, when discussing the two properties, we formulate  $\mathcal{L}^{self}$  as Eq. 1 of the main paper, which removes the positive pair in the denominator. Furthermore, [12] justifies that optimizing the  $\mathcal{L}^{self}$  even with a small batch size is comparable with  $\mathcal{L}_{ori}$  that requires a large batch size for allocating enough negatives. Thus, we set the latest  $\mathcal{L}^{self}$  as our objectives in Section 3.2 of the main paper.

When diving into the supervised contrastive loss  $\mathcal{L}^{sup}$ , we observe existing works, MUFI [8] and ER [1], neglect the similarities and differences between  $\mathcal{L}^{sup}$  and  $\mathcal{L}^{self}$ . To clarify the superiority of  $\mathcal{L}^{sup}$ , we derive the upper bounds of the two losses, and summarize the advantages of  $\mathcal{L}^{sup}$  in Section 3.2 of the main paper. To sum up, we justified that  $\mathcal{L}^{sup}$  is more feasible for zero-shot video classification.

## 2. Upper bounds of $\mathcal{L}^{self}$ and $\mathcal{L}^{sup}$

In Section 3.2 of the main paper, we present the upper bounds of  $\mathcal{L}^{self}$  and  $\mathcal{L}^{sup}$ . In this section, we perform the full derivations which are based on the upper bounds of LSE and  $\text{SP}_\lambda$  in Eq. 2 in the main paper:

$$\begin{aligned} \text{LSE}(x) &= \log\left(\sum_{x \in \mathcal{X}} \exp(x)\right), \\ &\leq \log(n \exp(\max_{x \in \mathcal{X}}(x))), \\ &= \max_{x \in \mathcal{X}}(x) + \log(n), \end{aligned} \quad (\text{b})$$

---

\*These authors contributed equally.

$$\begin{aligned}
\text{SP}_\lambda(x) &= \frac{1}{\lambda} \log(1 + \exp(\lambda x)), \\
&= \frac{1}{\lambda} \text{LSE}(\lambda y_{y \in \{x, 0\}}), \\
&\leq \max[x, 0] + \frac{\log(2)}{\lambda},
\end{aligned} \tag{c}$$

where  $n$  is the number of  $x$  in  $\mathcal{X}$ . We derive the upper bound of  $\mathcal{L}^{self}$  as follow:

$$\begin{aligned}
\mathcal{L}^{self} &= -\log\left[\frac{\exp[\lambda \text{sim}(v_{y_i}, s_{y_i})]}{\sum_{y_j \in \mathcal{Y} \setminus y_i} \exp[\lambda \text{sim}(v_{y_i}, s_{y_j})]}\right], \\
&= \lambda(-\text{sim}(v_{y_i}, s_{y_i}) + \frac{1}{\lambda} \text{LSE}(\lambda \text{sim}(v_{y_i}, s_{y_j})_{y_j \in \mathcal{Y} \setminus y_i})), \\
&\leq \lambda(\text{sim}_{\max} - \text{sim}(v_{y_i}, s_{y_i}) + \frac{\log(K-1)}{\lambda}),
\end{aligned} \tag{d}$$

where  $K$  is the number of  $y$  in  $\mathcal{Y}$ ,  $\text{sim}_{\max} = \max_{y_j \in \mathcal{Y} \setminus y_i} \text{sim}(v_{y_i}, s_{y_j})$ . The upper bound of  $\mathcal{L}^{sup}$  is derived as:

$$\begin{aligned}
\mathcal{L}^{sup} &= -\log\left[\frac{\exp[\lambda \text{sim}(v_{y_i}, s_{y_i})]}{\sum_{y_j \in \mathcal{Y}} \exp[\lambda \text{sim}(v_{y_i}, s_{y_j})]}\right], \\
&= \lambda \text{SP}_\lambda[-\text{sim}(v_{y_i}, s_{y_i}) + \frac{1}{\lambda} \text{LSE}(\lambda \text{sim}(v_{y_i}, s_{y_j})_{y_j \in \mathcal{Y} \setminus y_i})], \\
&\leq \lambda \text{SP}_\lambda[\text{sim}_{\max} - \text{sim}(v_{y_i}, s_{y_i}) + \frac{\log(K-1)}{\lambda}], \\
&\leq \lambda \max[\text{sim}_{\max} - \text{sim}(v_{y_i}, s_{y_i}) + \frac{\log(K-1)}{\lambda}, 0] + \log(2).
\end{aligned} \tag{e}$$

### 3. Visual centers $W$

In Section 3.3 of the main paper, we use Eq. 5 in the main paper to learn the visual centers  $W = [w_{y_1}, \dots, w_{y_K}]$  which is the parameter matrix of a linear classifier without biases. The parameter vector  $w_{y_k}$  from the linear classifier can be interpreted as the class representation of the class  $y_k$  [4, 6]. In this section, we justify how the visual centers approach visual features on a unit hypersphere during back-propagation. For convenience, we reprint Eq. 5 as follow:

$$\begin{aligned}
\mathcal{L}_C &= -\log \frac{\exp[\lambda \cos(v_{y_i}, w_{y_i})]}{\sum_{y_j \in \mathcal{Y}} \exp[\lambda \cos(v_{y_i}, w_{y_j})]}, \\
&= -\log \frac{\exp[\lambda \frac{v_{y_i}}{\|v_{y_i}\|} \times \frac{w_{y_i}}{\|w_{y_i}\|}]}{\sum_{y_j \in \mathcal{Y}} \exp[\lambda \frac{v_{y_i}}{\|v_{y_i}\|} \times \frac{w_{y_j}}{\|w_{y_j}\|}]} .
\end{aligned} \tag{f}$$

Then we derive the gradient of  $\mathcal{L}_C$  with respect to  $\frac{w_{y_k}}{\|w_{y_k}\|}$  as follow:

$$\frac{\partial \mathcal{L}_C}{\partial \frac{w_{y_k}}{\|w_{y_k}\|}} = \begin{cases} \lambda(P_{ik} - 1) \frac{v_{y_i}}{\|v_{y_i}\|}, & i = k \\ \lambda P_{ik} \frac{v_{y_i}}{\|v_{y_i}\|}, & i \neq k \end{cases}, \tag{g}$$

where,  $P_{ik} = \frac{\exp[\lambda \cos(v_{y_i}, w_{y_k})]}{\sum_{y_j \in \mathcal{Y}} \exp[\lambda \cos(v_{y_i}, w_{y_j})]} \in [0, 1]$ . During the back-propagation,  $\mathcal{L}_C$  encourages that changing  $\frac{w_{y_k}}{\|w_{y_k}\|}$  to  $\frac{\bar{w}_{y_k}}{\|\bar{w}_{y_k}\|} = \frac{w_{y_k}}{\|w_{y_k}\|} - l \cdot \frac{\partial \mathcal{L}_C}{\partial \frac{w_{y_k}}{\|w_{y_k}\|}}$  where  $l$  is the learning rate. We compute  $\cos(v_{y_i}, \bar{w}_{y_k})$  as follow:

$$\cos(v_{y_i}, \bar{w}_{y_k}) = \begin{cases} \cos(v_{y_i}, w_{y_k}) + l \cdot \lambda(1 - P_{ik}), & i = k \\ \cos(v_{y_i}, w_{y_k}) - l \cdot \lambda P_{ik}, & i \neq k \end{cases}, \tag{h}$$

Eq. [h](#) shows that  $\frac{w_{yk}}{\|w_{yk}\|}$  approaches the visual feature  $\frac{v_{yk}}{\|v_{yk}\|}$  (i.e.,  $\cos(v_{yk}, \bar{w}_{yk}) \geq \cos(v_{yk}, w_{yk})$ ) and stays away from  $\frac{v_{yi}}{\|v_{yi}\|}$ ,  $i \neq k$  (i.e.,  $\cos(v_{yi}, \bar{w}_{yk}) \leq \cos(v_{yi}, w_{yk})$ ) during the back-propagation. After a number of training iterations, we can treat  $\frac{w_{yk}}{\|w_{yk}\|}$  as the visual center of all  $\frac{v_{yk}}{\|v_{yk}\|}$  even if it may not be exactly the mean of all  $\frac{v_{yk}}{\|v_{yk}\|}$  due to the effect of hard positive/negative samples to  $P_{ik}$  [[9](#), [10](#)].

## References

- [1] Shizhe Chen and Dong Huang. Elaborative rehearsal for zero-shot action recognition. In *ICCV*, 2021. [1](#)
- [2] Ting Chen, Simon Kornblith, Mohammad Norouzi, and Geoffrey Hinton. A simple framework for contrastive learning of visual representations. In *ICML*, 2020. [1](#)
- [3] Ting Chen, Calvin Luo, and Lala Li. Intriguing properties of contrastive losses. *arXiv preprint arXiv:2011.02803*, 2020. [1](#)
- [4] Cunxiao Du, Zhaozheng Chen, Fuli Feng, Lei Zhu, Tian Gan, and Liqiang Nie. Explicit interaction model towards text classification. In *AAAI*, 2019. [2](#)
- [5] Kaiming He, Haoqi Fan, Yuxin Wu, Saining Xie, and Ross Girshick. Momentum contrast for unsupervised visual representation learning. In *CVPR*, 2020. [1](#)
- [6] Ofir Press and Lior Wolf. Using the output embedding to improve language models. *arXiv:1608.05859*, 2016. [2](#)
- [7] Rui Qian, Tianjian Meng, Boqing Gong, Ming-Hsuan Yang, Huisheng Wang, Serge Belongie, and Yin Cui. Spatiotemporal contrastive video representation learning. In *CVPR*, 2021. [1](#)
- [8] Zhaofan Qiu, Ting Yao, Chong-Wah Ngo, Xiao-Ping Zhang, Dong Wu, and Tao Mei. Boosting video representation learning with multi-faceted integration. In *CVPR*, 2021. [1](#)
- [9] Feng Wang, Jian Cheng, Weiyang Liu, and Haijun Liu. Additive margin softmax for face verification. *IEEE Signal Processing Letters*, pages 926–930, 2018. [3](#)
- [10] Feng Wang, Xiang Xiang, Jian Cheng, and Alan Loddon Yuille. Normface: L2 hypersphere embedding for face verification. In *Proceedings of the 25th ACM international conference on Multimedia*, 2017. [3](#)
- [11] Tongzhou Wang and Phillip Isola. Understanding contrastive representation learning through alignment and uniformity on the hypersphere. In *ICML*, 2020. [1](#)
- [12] Chun-Hsiao Yeh, Cheng-Yao Hong, Yen-Chi Hsu, Tyng-Luh Liu, Yubei Chen, and Yann LeCun. Decoupled contrastive learning. *arXiv:2110.06848*, 2021. [1](#)
